# Supplementary material for: Inosine pranobex enhances human NK cell cytotoxicity by inducing metabolic activation and NKG2D ligand expression
Source: PubMed Central journal article supplement (PMC6972573; doi:10.1002/eji.201847948), 2019-09-12
Supplement: EJI-50-130-s001.pdf [file EJI-50-130-s001.pdf]

# European Journal of Immunology

Supporting Information  
for

**DOI 10.1002/eji.201847948**

Michael T. McCarthy, Da Lin, Tomoyoshi Soga, Julie Adam  
and Christopher A. O'Callaghan

**Inosine pranobex enhances human NK cell cytotoxicity by inducing metabolic  
activation and NKG2D ligand expression**

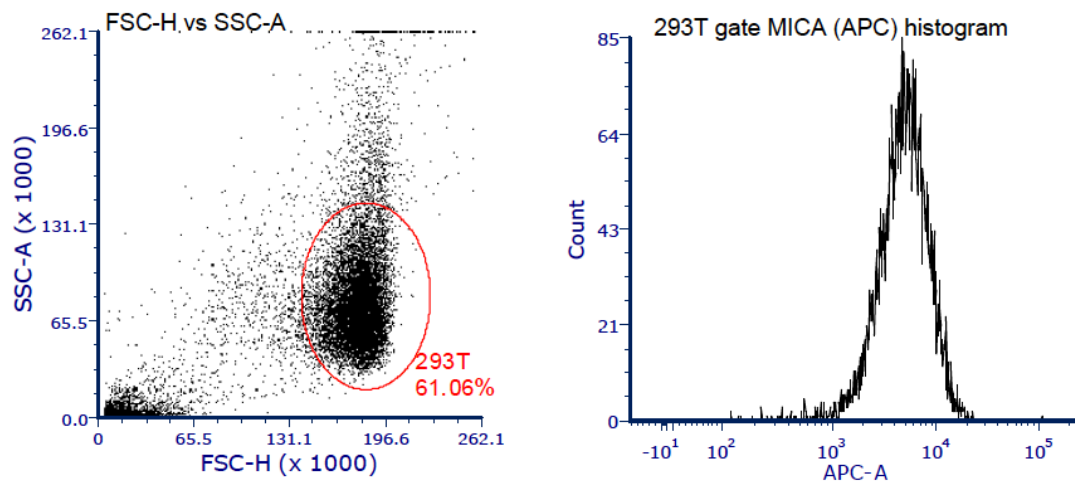

**Figure S1** Gating strategy.

(A) An FSC-H vs SSC-A plot was created, and a gate to include the central 293T cell population was drawn. (B) A frequency distribution histogram was drawn using the 293T cell gate. The mean fluorescence intensity of the relevant marker was calculated from this frequency distribution.
